# Supplementary material for: Studying and Analyzing Humane Endpoints in the Fructose-Fed and Streptozotocin-Injected Rat Model of Diabetes
Source: MDPI journal article supplement (doi:10.3390/ani13081397), 2023-04-18
Supplement: s1 [file s1]

**Table S1.** The final score assigned to each animal throughout the trial.

|                           | Weeks     | 0 | 1 | 2 | 3 | 4 | 5 | 6 | 7 | Maximum<br>score as-<br>signed |
|---------------------------|-----------|---|---|---|---|---|---|---|---|--------------------------------|
| <b>Control<br/>(n=8)</b>  | <b>1</b>  | 0 | 0 | 0 | 0 | 0 | 0 | 0 | 0 | 0                              |
|                           | <b>2</b>  | 0 | 0 | 0 | 0 | 0 | 0 | 0 | 0 | 0                              |
|                           | <b>3</b>  | 0 | 0 | 0 | 0 | 0 | 0 | 0 | 0 | 0                              |
|                           | <b>4</b>  | 0 | 0 | 0 | 0 | 0 | 0 | 0 | 0 | 0                              |
|                           | <b>5</b>  | 0 | 0 | 0 | 0 | 0 | 0 | 0 | 0 | 0                              |
|                           | <b>6</b>  | 0 | 0 | 0 | 0 | 0 | 0 | 0 | 0 | 0                              |
|                           | <b>7</b>  | 0 | 0 | 0 | 0 | 0 | 0 | 0 | 0 | 0                              |
|                           | <b>8</b>  | 0 | 0 | 0 | 0 | 0 | 0 | 0 | 0 | 0                              |
| <b>Induced<br/>(n=16)</b> | <b>1</b>  | 0 | 0 | 0 | 0 | 0 | 0 | 1 | 1 | 1                              |
|                           | <b>2</b>  | 0 | 0 | 0 | 2 | 1 | 1 | 1 | 1 | 2                              |
|                           | <b>3</b>  | 0 | 0 | 1 | 1 | 1 | 1 | 2 | 1 | 2                              |
|                           | <b>4</b>  | 0 | 0 | 0 | 1 | 1 | 1 | 1 | 3 | 3                              |
|                           | <b>5</b>  | 0 | 0 | 1 | 0 | 0 | 0 | 1 | 3 | 3                              |
|                           | <b>6</b>  | 0 | 0 | 0 | 1 | 0 | 0 | 0 | 0 | 1                              |
|                           | <b>7</b>  | 0 | 0 | 1 | 1 | 0 | 0 | 1 | 0 | 1                              |
|                           | <b>8</b>  | 0 | 0 | 0 | 0 | 0 | 1 | 0 | 0 | 1                              |
|                           | <b>9</b>  | 0 | 0 | 1 | 1 | 1 | 1 | 1 | 3 | 3                              |
|                           | <b>10</b> | 0 | 0 | 0 | 0 | 0 | 0 | 1 | 0 | 1                              |
|                           | <b>11</b> | 0 | 0 | 0 | 0 | 0 | 1 | 1 | 2 | 2                              |
|                           | <b>12</b> | 0 | 0 | 0 | 2 | 0 | 1 | 1 | 2 | 2                              |
|                           | <b>13</b> | 0 | 0 | 1 | 0 | 0 | 0 | 1 | 1 | 1                              |
|                           | <b>14</b> | 0 | 0 | 0 | 2 | 0 | 0 | 1 | 3 | 3                              |
|                           | <b>15</b> | 0 | 0 | 0 | 0 | 2 | 1 | 2 | 1 | 2                              |
|                           | <b>16</b> | 0 | 0 | 1 | 0 | 0 | 0 | 0 | 0 | 1                              |

The group control (n = 8) was intraperitoneally administrated with 0.1 M citrate buffer, while the induced group (n = 16) was intraperitoneally administrated with STZ + 0.1 M citrate buffer.
